# Supplementary material
Source: PubMed Central journal article supplement (PMC4933322)

## SUPPLEMENTAL MATERIAL

Supplemental Table. Aortic Stiffness and LV Variables Stratified by Gender

|                                   | Women (n=1110)    | Men (n=983)       | p      |
|-----------------------------------|-------------------|-------------------|--------|
| <b>Aortic Stiffness Parameter</b> |                   |                   |        |
| Aortic arch PWV, m/s              | 7.9 (6.3 to 10.0) | 8.0 (6.5 to 10.1) | 0.08   |
| <b>LV parameters</b>              |                   |                   |        |
| LVMi, g/m <sup>1.7</sup>          | 46.5 ± 9.5        | 57.5 ± 11.3       | <0.001 |
| LVEDVi, ml/m <sup>1.7</sup>       | 47.3 ± 9.4        | 52.5 ± 11.8       | <0.001 |
| LVESVi, ml/m <sup>1.7</sup>       | 17.5 ± 5.2        | 21.4 ± 7.3        | <0.001 |
| LVMVR, g/ml                       | 1.00 ± 0.20       | 1.13 ± 0.24       | <0.001 |
| LVEF, %                           | 64.0 ± 6.7        | 59.6 ± 7.5        | <0.001 |
| Ecc, %                            | -16.7 ± 3.3       | -15.7 ± 3.3       | <0.001 |
| Torsion, °/cm                     | 4.6 ± 1.3         | 3.7 ± 1.1         | <0.001 |
| EDSR, 1/s                         | 0.120 ± 0.052     | 0.102 ± 0.050     | <0.001 |

p for women vs. men. Abbreviations as in Table 1.

Supplemental Figure. Histogram for Aortic Arch PWV

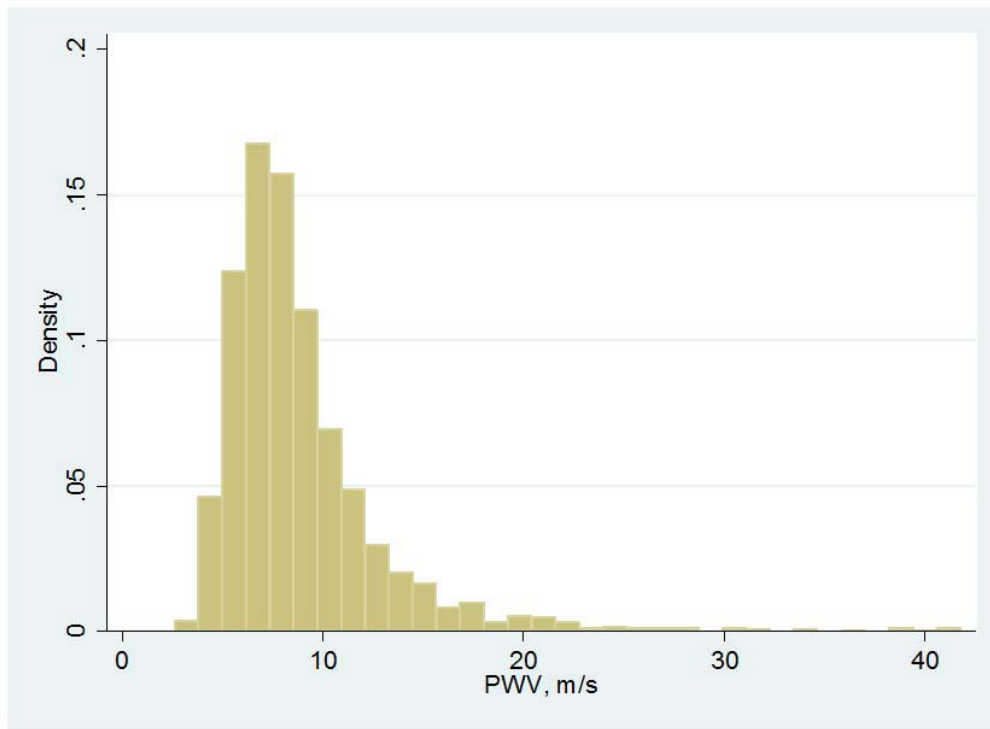

Supplement: NIHMS788524-supplement-Supplemental_Material.pdf [file NIHMS788524-supplement-Supplemental_Material.pdf]
